# Supplementary material for: Enhanced electrolytic oxygen evolution by the synergistic effects of trimetallic FeCoNi boride oxides immobilized on polypyrrole/reduced graphene oxide
Source: Royal Society of Chemistry journal article supplement (doi:10.1039/c9ta10756h), 2020-01-01
Supplement: c9ta10756h1.pdf [file c9ta10756h1.pdf]

# **Supporting information for**

## **Enhanced electrolytic oxygen evolution by the synergistic effects**

### **of trimetallic FeCoNi boride oxides immobilized on**

### **polypyrrole/reduced graphene oxide**

Hui Mao<sup>a</sup>, Xi Guo<sup>a</sup>, Yuanlin Fu<sup>a</sup>, Haoran Yang<sup>a</sup>, Yu Zhang<sup>a</sup>, Rui Zhang<sup>a, b</sup> \* and Xi-Ming Song<sup>a</sup> \*

<sup>a</sup>Liaoning Key Laboratory for Green Synthesis and Preparative Chemistry of Advanced Materials,  
College of Chemistry, Liaoning University, Shenyang 110036, China

<sup>b</sup>College of Pharmaceutical Engineering, Shen Yang Pharmaceutical University,  
Shenyang 110016, P.R. China

\*Author to whom any correspondence should be addressed.

Tel.: 86-24-62202378; Fax: 86-24-62202380

E-mail: [ruizhang@lnu.edu.cn](mailto:ruizhang@lnu.edu.cn) (R. Z.) and [songlab@lnu.edu.cn](mailto:songlab@lnu.edu.cn) (X. M. S.)

Numbers of pages: 8

**Experimental Section**

**Materials:** Pyrrole (Py) ( $\geq 98.0\%$ ),  $\text{NaBH}_4$  ( $\geq 96.0\%$ ) and high-purity graphite powder ( $\geq 99.85\%$ ) are chemical grade, which were purchased from Sinopharm Chemical Reagent Co. Ltd.. All the other reagents were analytical grade and used without further purification, such as  $\text{KMnO}_4$  (Tianjin Baishi Chemical Co. Ltd,  $\geq 99.5\%$ ),  $\text{FeCl}_3 \cdot 6\text{H}_2\text{O}$  ( $\geq 99.0\%$ ),  $\text{CoCl}_2 \cdot 6\text{H}_2\text{O}$  ( $\geq 99.0\%$ ),  $\text{NiCl}_2 \cdot 6\text{H}_2\text{O}$  ( $\geq 99.0\%$ ) and  $\text{H}_2\text{SO}_4$  ( $\geq 98.3\%$ ) (Sinopharm Chemical Reagent Co. Ltd.), ethanol ( $\geq 99.7\%$ ) (Tianjin Yongda Chemical Reagent Co., Ltd.),  $\text{IrO}_2$  (Aladdin reagent (Shanghai) Co., Ltd.,  $\geq 99.9\%$ ),  $\text{H}_2\text{O}_2$  (Shenyang Xinhua Reagent Factory,  $\geq 30.0\%$ ),  $\text{KOH}$  (Tianjin Damao Chemical Factory,  $\geq 85.0\%$ ) and  $\text{NaNO}_3$  (Tianjin Bodi Chemicals Co., Ltd.,  $\geq 99.0\%$ ).

**Characterizations and Apparatus:** The morphology and size of  $\text{FeCoNiBO}_x/\text{PPy}/\text{rGO}$  nanocomposites were determined with scanning electron microscopy (SEM) measurements (performed on a Hitachi SU-8010 electron microscope with primary electron energy of 10 kV) and transmission electron microscopy (TEM) measurements (performed on a JEM-2100 electron microscope (JEOL, Japan) equipped with a CCD camera at an acceleration voltage of 200 kV). The chemical composition of  $\text{FeCoNiBO}_x/\text{PPy}/\text{rGO}$  was determined by energy dispersive spectroscopy (EDS) measurement via EDAX-TEAM™ EDS (USA) integrated on the SEM (Hitachi, SU-8010). X-Ray Diffraction (XRD) patterns were obtained with a D8 AXS diffractometer (Bruker, GER) using  $\text{Cu K}\alpha$  radiation. Fourier transform infrared (FTIR) spectra of KBr powder-pressed pellets were recorded on a PerkinElmer Spectrum One FTIR spectrometer (PerkinElmer Corp., USA). Raman measurements were acquired using an inVia Raman microscope (Renishaw, Gloucestershire, United Kingdom) with excitation laser wavelength at 633 nm. Analysis of the X-ray photoelectron spectra (XPS) was performed on a Kratos Axis Ultra DLD electron spectrometer using a monochromatic  $\text{Al K}\alpha$  source operated at 150 W. The weight content of Fe, Co and Ni element in  $\text{FeCoNiBO}_x/\text{PPy}/\text{rGO}$  nanocomposites were determined by an inductively coupled plasma-optical emission spectrometry (ICP-OES, Agilent 5110, Agilent, USA) after concentrated acids ( $\text{HNO}_3:\text{H}_2\text{O}_2=7:1$ , v/v) digestion. The electrochemical performance of  $\text{FeCoNiBO}_x/\text{PPy}/\text{rGO}$  was investigated by using linear sweep voltammetry (LSV) and cyclic voltammetry (CV) with a CHI660E Electrochemical Station (Shanghai CHENHUA instrument Co., Ltd.). In a three-electrode system, a modified GCE, a platinum wire and an  $\text{Hg}/\text{HgO}$  electrode were used

as the working electrode, the counter electrode and the reference electrode, respectively. The measurements were performed in 1.0 M KOH with IR-compensation. The measured potentials versus Hg/HgO were converted to reversible hydrogen electrode (RHE). The interfacial charge-transfer resistance of samples was determined by using electrochemical impedance spectroscopy (EIS) in the frequency range between 0.01 Hz and 10000 Hz with a perturbation signal of 5 mV.

The measured potentials versus Hg/HgO were converted to RHE scale according to the Nernst equation:

$$E_{\text{RHE}} = E_{\text{Hg/HgO}} + 0.059\text{pH} + 0.098 \quad (\text{Eqs. S1})$$

The Tafel slope was obtained by LSV curves and calculated according to the following equation:

$$\eta = a + b \log J \quad (\text{Eqs. S2})$$

where  $\eta$  is the overpotential,  $J$  is the current density, and  $b$  is the Tafel slope. The overpotential was calculated as follows:

$$\eta = E_{\text{RHE}} - 1.23 \quad (\text{Eqs. S3})$$

**Double layer capacitance ( $C_{\text{dl}}$ ) measurements:** To measure the electrochemical capacitance, the potential was swept between 1.12 to 1.28 V vs. RHE at different scanning rates (2, 4, 6, 8, 10, 12, 14, 16, 18 and 20 mV s<sup>-1</sup>) with an assumption of double layer charging in the potential range. The capacitive currents at 1.19 V vs. RHE were measured and plotted as a function of scanning rate. The linear slope of  $|\Delta j| = |j_a - j_c|$  against scanning rates was twice the  $C_{\text{dl}}$ .

**Determination of electrochemically active surface area (ECSA):** Assume that the specific capacitance ( $C_s$ ) for a flat surface was about 40  $\mu\text{F cm}^{-2}$  for 1  $\text{cm}^2$  of real surface area,<sup>S1</sup> the ECSA was calculated as follows:

$$\text{ECSA} = C_{\text{dl}}/C_s \quad (\text{Eqs. S4})$$

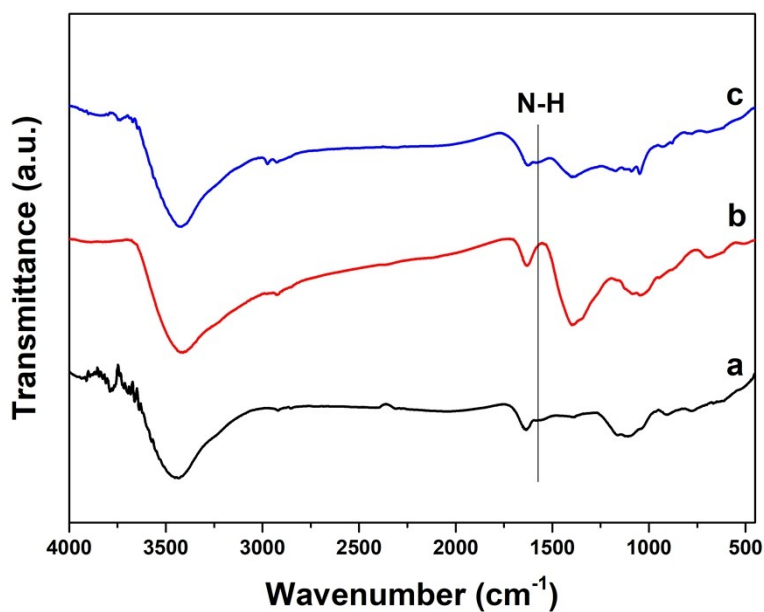

**Fig. S1.** FTIR spectra of (a) PPy/rGO; (b) FeCoNiBO<sub>x</sub> and (c) FeCoNiBO<sub>x</sub>/PPy/rGO.

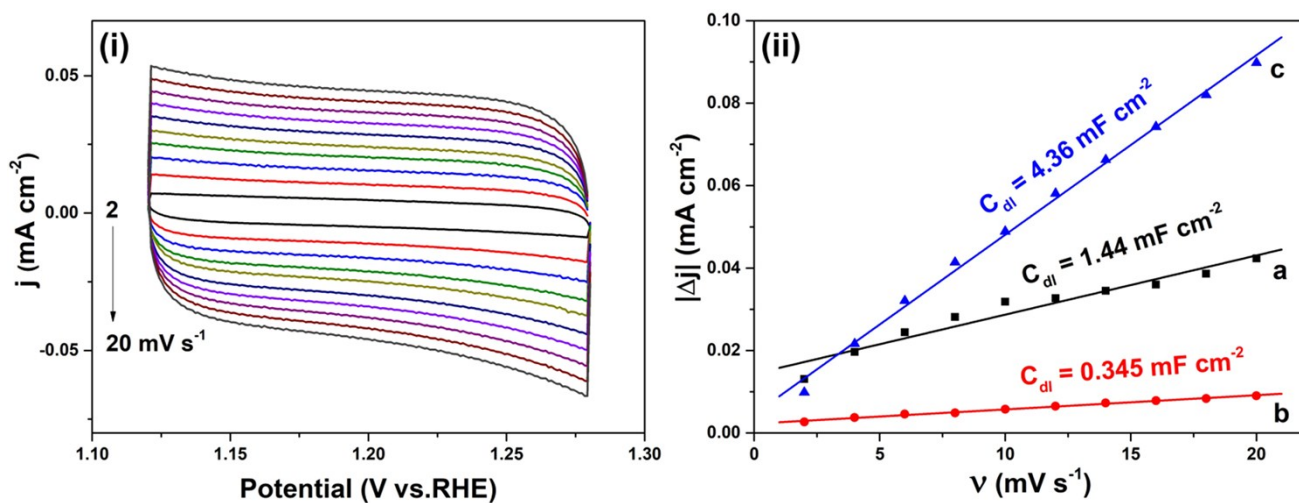

**Fig. S2.** (i) cyclic voltammograms of FeCoNiBO<sub>x</sub>/PPy/rGO modified GCE at different scanning rate in the range of 2-20 mV s<sup>-1</sup> in 1 M KOH with saturated O<sub>2</sub>; (ii): plots of anodic peak current density vs. scanning rates from (i) at 1.19 V by (a) FeCoNiBO<sub>x</sub>, (b) FeCoNiBO<sub>x</sub>/rGO and (c) FeCoNiBO<sub>x</sub>/PPy/rGO

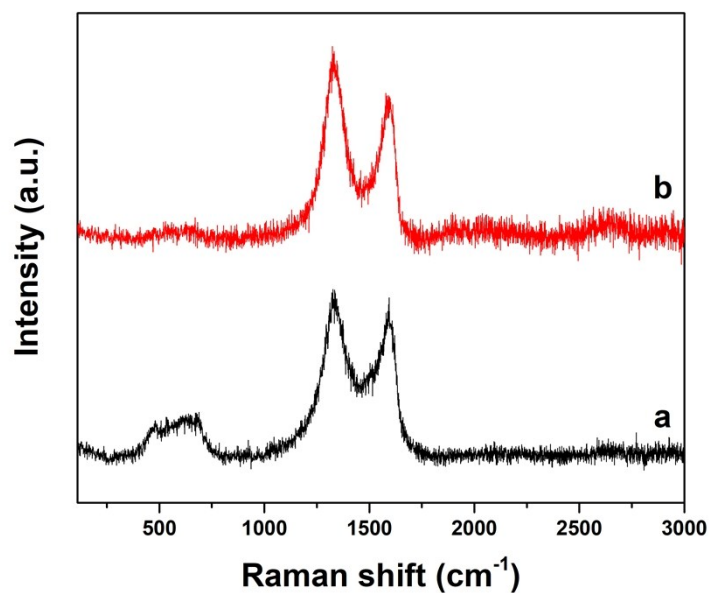

**Fig. S3.** Raman spectra of FeCoNiBO<sub>x</sub>/PPy/rGO (a) before and (b) after electrocatalysis for 20 h by chronoamperometry.

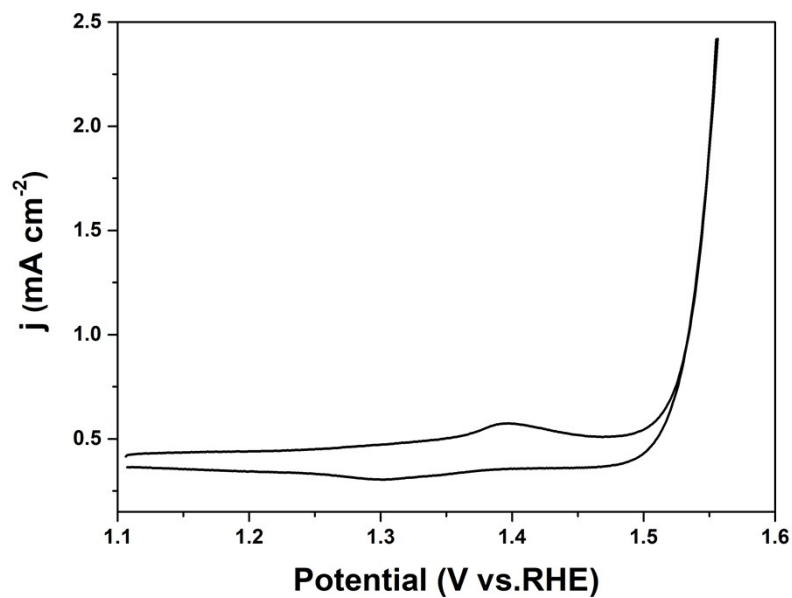

**Fig. S4.** cyclic voltammograms of FeCoNiBO<sub>x</sub>/PPy/rGO modified GCE at scanning rate of 10 mV s<sup>-1</sup> in 1 M KOH with saturated O<sub>2</sub>.

**Table S1.** Comparison of the electrocatalytic OER activity of representative nonprecious OER catalysts in 1.0 M KOH electrolyte.

| Electrocatalysts                                              | $\eta_{10}$ (mV)@<br>$j_a=10 \text{ mA cm}^{-2}$ | Tafel slop<br>(mV dec <sup>-1</sup> ) | Substrate    | Ref.             |
|---------------------------------------------------------------|--------------------------------------------------|---------------------------------------|--------------|------------------|
| <b>FeCoNiBO<sub>x</sub>/PPy/rGO</b>                           | <b>290</b>                                       | <b>47.0</b>                           | <b>GCE</b>   | <b>This work</b> |
| <sup>a</sup> FeCoNi oxynitride                                | 291                                              | 63.8                                  | GCE          | S2               |
| <sup>b</sup> FeCoNi-LTH/NiCo <sub>2</sub> O <sub>4</sub>      | 300                                              | 71.5                                  | carbon cloth | S3               |
| <sup>c</sup> FeCo/FeCoNi@NCNTs-HFs                            | 378                                              | 57.0                                  | GCE          | S4               |
| <sup>d</sup> FeCoNi                                           | 300                                              | 45.0                                  | nickel foam  | S5               |
| <sup>e</sup> FeCoNi@FeNC                                      | 330                                              | 57.0                                  | GC RDE       | S6               |
| <sup>f</sup> FeCoMo                                           | 270                                              | 63.0                                  | carbon paper | S7               |
| <sup>g</sup> FeCoNi alloys encapsulated<br>in graphene layers | 288                                              | 60.0                                  | GC RDE       | S8               |
| <sup>h</sup> CoFe@NC/rGO                                      | 278                                              | 52.0                                  | GCE          | S9               |

<sup>a</sup> FeCoNi oxynitride core-shell nanostructures with a homogeneously nitride core and oxide shell

<sup>b</sup> NiCo<sub>2</sub>O<sub>4</sub> nanoneedles decorated with FeCoNi layered ternary hydroxides

<sup>c</sup> FeCo/FeCoNi/N-doped carbon nanotubes grafted polyhedron-derived hybrid fibers

<sup>d</sup> electrodeposited ternary iron-cobalt-nickel catalyst on nickel foam

<sup>e</sup> ultrathin Fe-N-C nanosheets coordinated Fe-doped CoNi alloy nanoparticles

<sup>f</sup> FeCoMo supported on carbon paper pre-heated at 1000 °C for 1 min

<sup>g</sup> graphene layers encapsulated FeCoNi ternary alloys

<sup>h</sup> metal organic framework derived CoFe@N-doped carbon/reduced graphene sheets

**Table S2.** The  $\eta_{\text{onset}}$ ,  $\eta_{10}$  and Tafel slop performance of the products synthesized in this work.

| The products                        | $\eta_{\text{onset}}$ (mV)@<br>$j_a=1 \text{ mA cm}^{-2}$ | $\eta_{10}$ (mV)@<br>$j_a=10 \text{ mA cm}^{-2}$ | Tafel slop<br>(mV dec <sup>-1</sup> ) |
|-------------------------------------|-----------------------------------------------------------|--------------------------------------------------|---------------------------------------|
| rGO                                 | 407                                                       | --                                               | 183.6                                 |
| PPy/rGO                             | 400                                                       | --                                               | 115.1                                 |
| FeCoNiBO <sub>x</sub>               | 297                                                       | 366                                              | 103.6                                 |
| FeCoNiBO <sub>x</sub> /rGO          | 240                                                       | 311                                              | 78.0                                  |
| <b>FeCoNiBO<sub>x</sub>/PPy/rGO</b> | <b>230</b>                                                | <b>290</b>                                       | <b>47.0</b>                           |
| IrO <sub>2</sub>                    | 242                                                       | 288                                              | 48.4                                  |
| NiBO <sub>x</sub> /PPy/rGO          | 350                                                       | --                                               | 132.5                                 |
| FeBO <sub>x</sub> /PPy/rGO          | 320                                                       | 390                                              | 63.1                                  |
| CoBO <sub>x</sub> /PPy/rGO          | 206                                                       | 348                                              | 112.1                                 |
| NiFeBO <sub>x</sub> /PPy/rGO        | 290                                                       | 380                                              | 85.4                                  |
| CoNiBO <sub>x</sub> /PPy/rGO        | 357                                                       | 480                                              | 78.2                                  |
| CoFeBO <sub>x</sub> /PPy/rGO        | 289                                                       | 340                                              | 63.2                                  |

## References

- S1 X. Li, L. Zhang, M. Huang, S. Wang, X. Li and H. Zhu, *Journal of Materials Chemistry A*, 2016, **4**, 14789.
- S2 J. Di, H. Zhu, J. Xia, J. Bao, P. Zhang, S.-Z. Yang, H. Li and S. Dai, *Nanoscale*, 2019, **11**, 7239.
- S3 Y. Liu, Y. Bai, Y. Han, Z. Yu, S. Zhang, G. Wang, J. Wei, Q. Wu and K. Sun, *ACS applied materials & interfaces*, 2017, **9**, 36917.
- S4 Z. Wang, J. Ang, B. Zhang, Y. Zhang, X. Y. D. Ma, T. Yan, J. Liu, B. Che, Y. Huang and X. Lu, *Applied Catalysis B: Environmental*, 2019, **254**, 26.
- S5 Y. Li, S. Yang, H. Li, G. Li, M. Li, L. Shen, Z. Yang and A. Zhou, *Colloids and Surfaces A: Physicochemical and Engineering Aspects*, 2016, **506**, 694.
- S6 Q. Zhang, R. F. Webster, S. Cheong, R. D. Tilley, X. Lu and R. Amal, *Particle & Particle Systems Characterization*, 2019, **36**, 1800252.
- S7 H. Zhang, J. Zheng, Y. Chao, K. Zhang and Z. Zhu, *New Journal of Chemistry*, 2018, **42**, 7254.
- S8 Y. Yang, Z. Lin, S. Gao, J. Su, Z. Lun, G. Xia, J. Chen, R. Zhang and Q. Chen, *ACS Catalysis*, 2016, **7**, 469.
- S9 F. Kong, K. Chen, S. Song and D. Xue, *Inorganic Chemistry Frontiers*, 2018, **5**, 1962.
